# Supplementary material for: Near-infrared photothermal performance of a metal–organic framework-based composite
Source: Royal Society of Chemistry journal article supplement (doi:10.1039/d1dt02853g), 2021-01-01
Supplement: d1dt02853g1.pdf [file d1dt02853g1.pdf]

# Supplementary Information

## **Near-infrared photothermal performance of a metal organic framework-based composite**

Jing Sun, Kuan Pang, Tian-Fu Liu, Jibin Song and Rong Cao

## 1. Materials and characterization

### 1.1 Materials

Poly(vinylpyrrolidone) (PVP), sodium selenite ( $\text{Na}_2\text{SeO}_3$ ), bismuth nitrate pentahydrate ( $\text{Bi}(\text{NO}_3)_3 \cdot 5\text{H}_2\text{O}$ ), zinc nitrate hexahydrate ( $\text{Zn}(\text{NO}_3)_2 \cdot 6\text{H}_2\text{O}$ ), 2-methylimidazole (2-MIM), deionized water (DI), ethylene glycol (EG), methanol (MeOH), acetone, ethanol (EtOH), methyl cyanide (MeCN), hydrazine hydrate. Unless otherwise mentioned, all reagents and solvents were purchased from commercial sources and used as received without further purification.

### 1.2 Characterization

PXRD was performed on Rikagu Miniflex 600 Benchtop X-ray diffraction instrument. TGA was performed on a Seiko S-II instrument, and the dried crystalline samples were heated at a rate of  $5\text{ }^\circ\text{C}/\text{min}$  up to  $800\text{ }^\circ\text{C}$  and then cooled to room temperature under  $\text{N}_2$  atmosphere. The  $\text{N}_2$  isotherms of the samples were measured using ASAP 2460 from Micromeritics Co. Ltd. SEM was performed on a JSM6700-F Field Emission scanning electron microscope. TEM was performed on a Tecnai F20 Field transmission scanning electron microscope. UV-Vis absorbance of liquid samples were collected at room temperature on a PerkinElmer Lambda 365 spectrophotometer equipped with Labsphere integrating over the spectral range  $\lambda = 500\text{-}900\text{ nm}$ , and the solid samples were collected at room temperature on a Perkin Elmer Lambda 950 spectrophotometer equipped with Labsphere integrating over the spectral range  $\lambda = 300\text{-}850\text{ nm}$  using  $\text{BaSO}_4$  as standards.

## 2. Scanning electron microscopy (SEM)

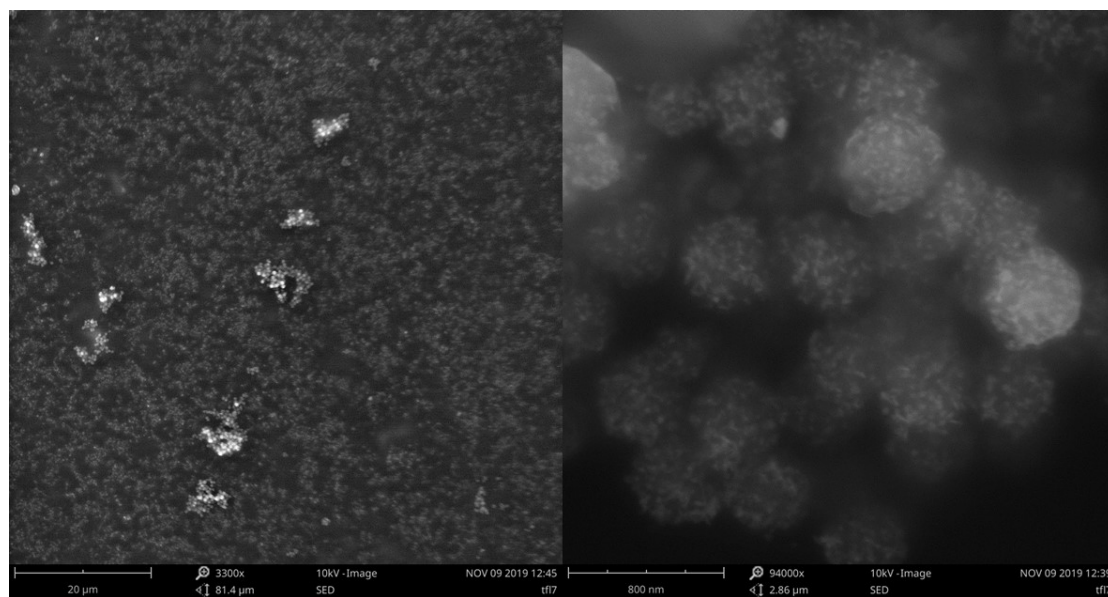

**Figure S1.** SEM images of  $\text{Bi}_2\text{Se}_3@ZIF-8$  NPs.

### 3. Transmission scanning electron microscopy

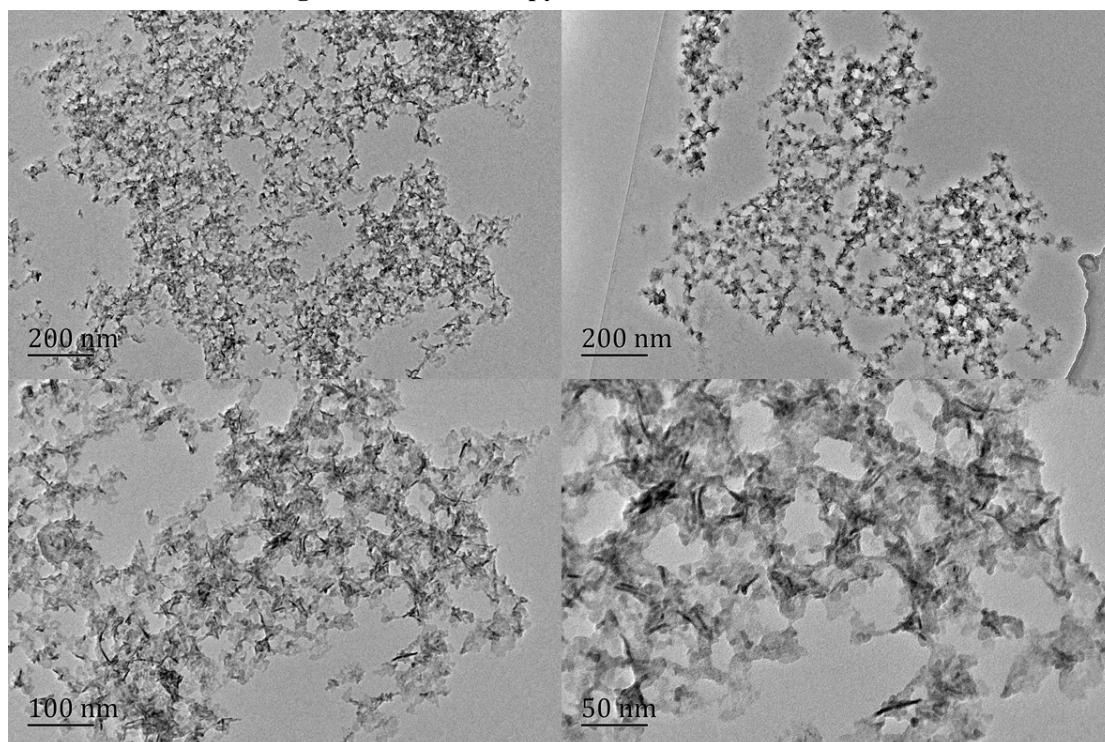

Figure S2. TEM images of Bi<sub>2</sub>Se<sub>3</sub> NPs.

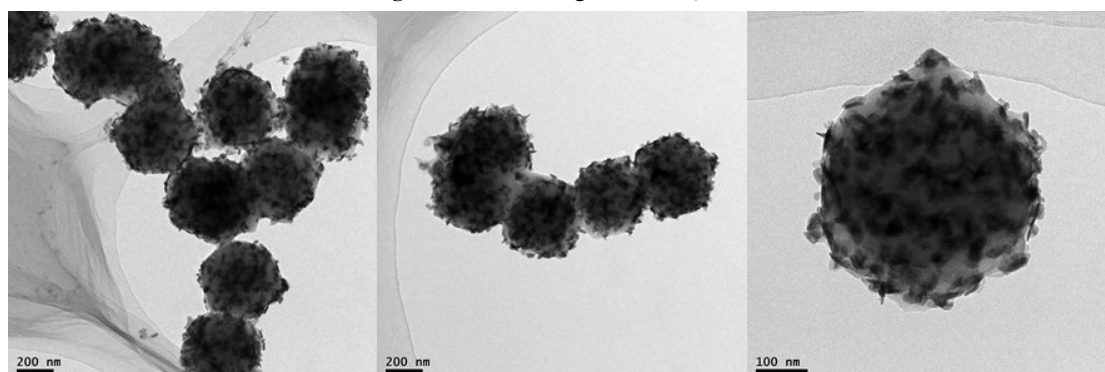

Figure S3. TEM images of Bi<sub>2</sub>Se<sub>3</sub>@ZIF-8 NPs.

### 4. Powder X-ray diffraction patterns

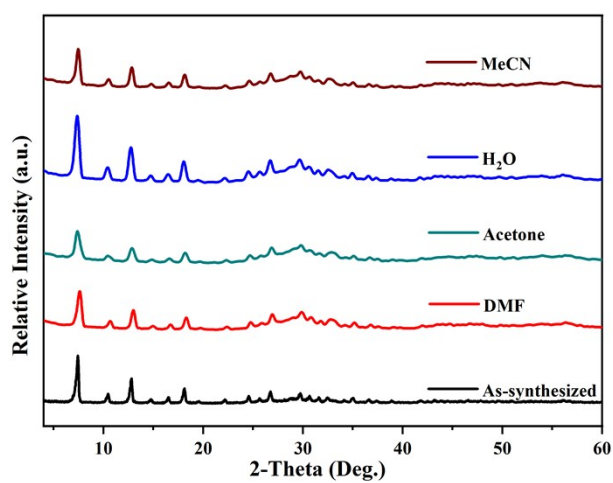

Figure S4. PXRD patterns of Bi<sub>2</sub>Se<sub>3</sub>@ZIF-8 NPs exposed to different solvent after 24 h.

## 5. IR spectra

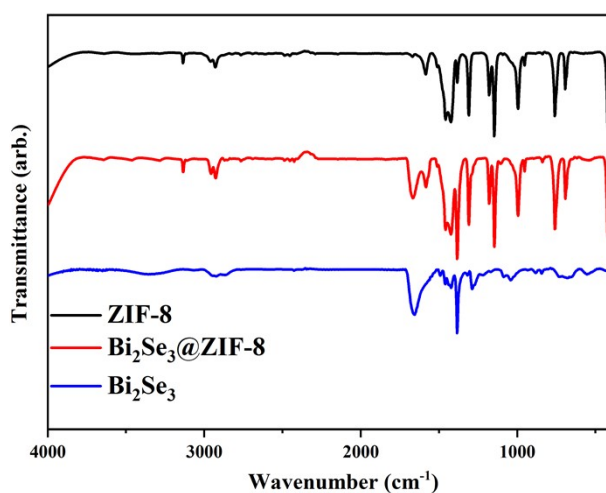

Figure S5. IR spectra of Bi<sub>2</sub>Se<sub>3</sub> NPs (blue), ZIF-8 (black) and Bi<sub>2</sub>Se<sub>3</sub>@ZIF-8 NPs (red).

## 6. Pore size distribution

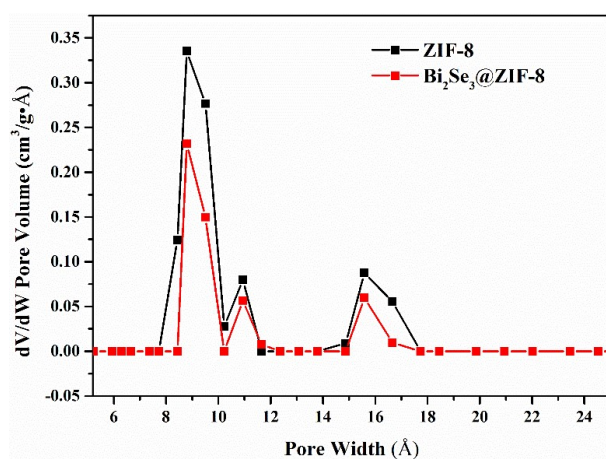

Figure S6. Pore size distribution of ZIF-8 (black) and Bi<sub>2</sub>Se<sub>3</sub>@ZIF-8 (red).

## 7. Thermogravimetric analyses (TGA)

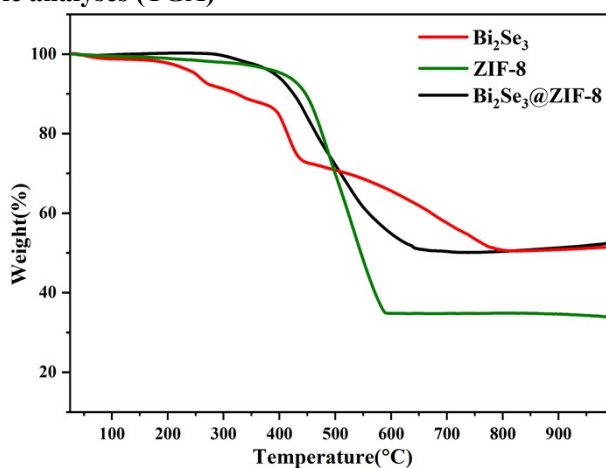

Figure S7. TGA curves of Bi<sub>2</sub>Se<sub>3</sub> NPs (red), ZIF-8 (green) and Bi<sub>2</sub>Se<sub>3</sub>@ZIF-8 NPs (black).

## 8. Ultraviolet-visible-near infrared absorption spectra

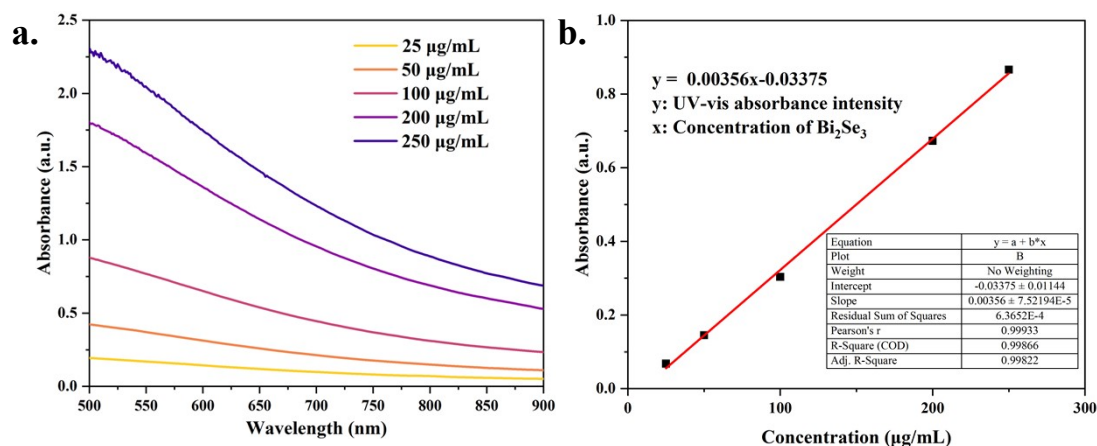

**Figure S8.** (a) Absorbance spectra of the  $\text{Bi}_2\text{Se}_3$  NPs dispersed in water at concentrations of 25, 50, 100, 200, 250  $\mu\text{g/mL}$ . (b) Absorbance intensity for  $\lambda = 808$  nm at different concentrations of  $\text{Bi}_2\text{Se}_3$  NPs.

## 9. Transient photocurrent responses

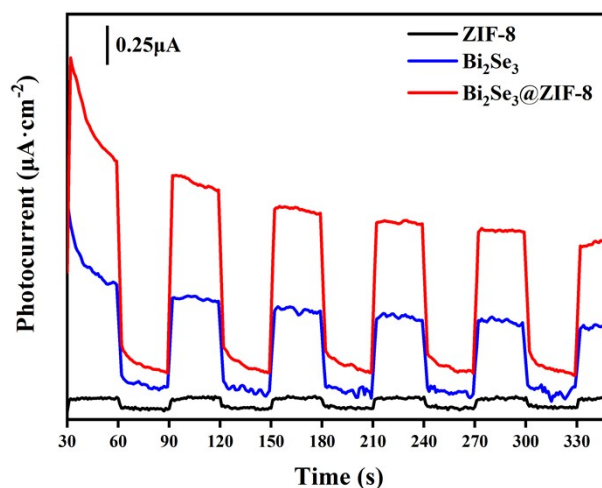

**Figure S9.** Transient photocurrent responses of ZIF-8,  $\text{Bi}_2\text{Se}_3$ , and  $\text{Bi}_2\text{Se}_3@ZIF-8$ .

## 10. Photothermal experiments

The accurate photothermal conversion efficiency (PTCE,  $\eta$ ) of  $\text{Bi}_2\text{Se}_3@ZIF-8$  was calculated according to a previously described method. In general, the powdery sample was suspended into 1 mL MeOH (0.7 mg/mL) at room temperature (30  $^{\circ}\text{C}$ ). The mixture was irradiated for 10 minutes (808 nm,  $3 \text{ W} \cdot \text{cm}^{-2}$ ). Then the laser was shut off to allow the system to cool down to room temperature naturally. Both the temperature-rise and cooling process were recorded by a thermometer. This experiment of  $\text{Bi}_2\text{Se}_3@ZIF-8$  was repeated three times for photothermal stability. Herein, the light intensity can remain almost constant as  $3 \text{ W} \cdot \text{cm}^{-2}$  detected by a photoradiometer. Besides, the Ultraviolet-visible-near infrared absorption spectra of  $\text{Bi}_2\text{Se}_3@ZIF-8$  at 808 nm (0.7 mg/mL) were tested. Detailed calculation methods were showed as follows:

The PTCE ( $\eta$ ) can be defined as the fraction of absorbed light energy that is converted to thermal energy, as shown in the following equation:

$$\eta = \frac{hs(T_{max} - T_{surr}) - Q_{Dis}}{I(1 - 10^{-A})} \quad \text{----- Equation S1.}$$

Herein,  $I$  is the laser power (3 mW,  $1 \text{ cm}^2$ );  $A$  is the absorbance of aqueous suspension at the wavelength of 808 nm (Figure S10 b);  $T_{max}$  and  $T_{surr}$  (30  $^{\circ}\text{C}$ ) are the maximum steady state temperature and the ambient temperature, respectively;  $h$  is the heat transfer coefficient and  $s$  is the surface area of the container, which are

determined from the following equation:

$$hs = \frac{mc}{\tau_s} \text{ ---- Equation S2.}$$

$m$  is the mass of the solution (around 0.791 g);  $c$  is the specific heat capacity of the solvent (2.5685 J g<sup>-1</sup> °C<sup>-1</sup> for MeOH); and  $\tau_s$  is a time constant, which can be determined in cooling periods from the following equation:

$$t = -\tau_s \ln(\theta) \text{ ---- Equation S3.}$$

$\theta$  is a time dependent dimensionless parameter, known as the driving force temperature, defined as follows:

$$\theta = \frac{T - T_{Surr}}{T_{Max} - T_{Surr}} \text{ ---- Equation S4.}$$

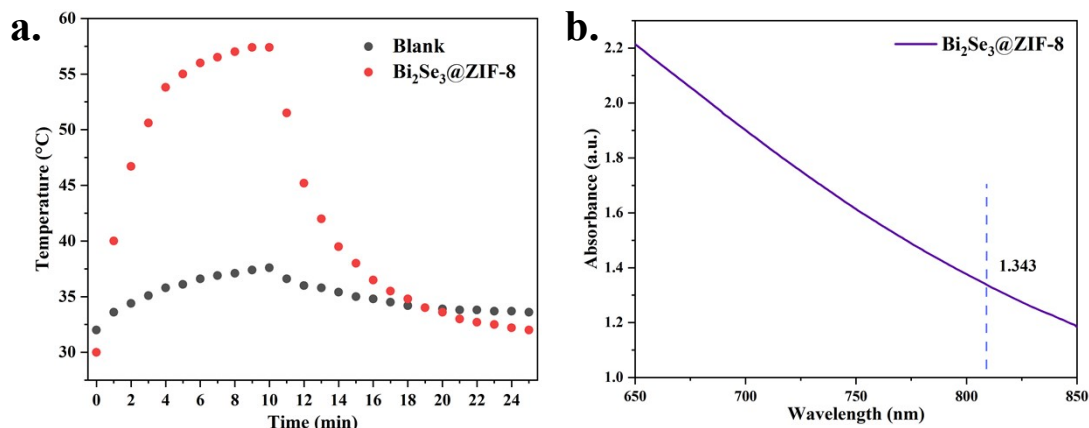

Figure S10. a) Photothermal conversion curves of blank and Bi<sub>2</sub>Se<sub>3</sub>@ZIF-8 NPs suspensions in MeOH (0.7 mg/mL) under NIR irradiation (808 nm, 3 W·cm<sup>-2</sup>) for 10 minutes and then switch the laser off. b) The NIR absorption spectra of Bi<sub>2</sub>Se<sub>3</sub>@ZIF-8 NPs suspensions in MeOH (0.7 mg/mL).

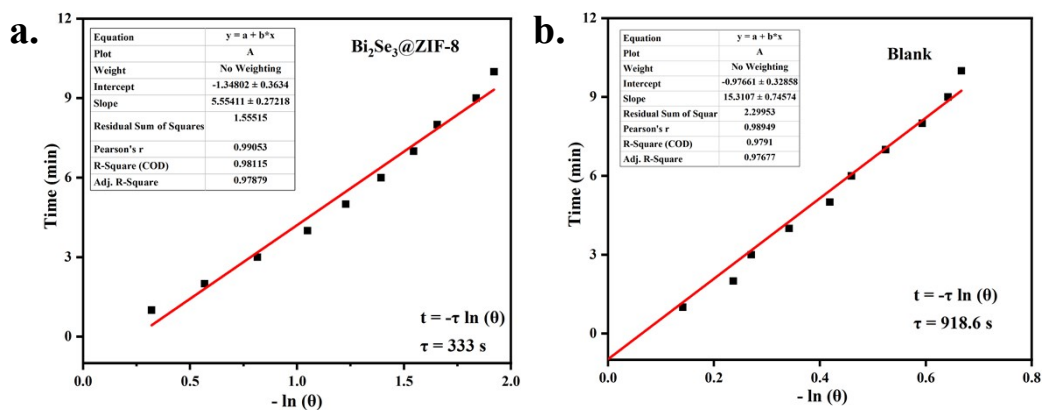

Figure S11. The plots of time versus  $-\ln(\theta)$  from the data recorded during the cooling period (Figure S10 a) of the experiments for Bi<sub>2</sub>Se<sub>3</sub>@ZIF-8 NPs and blank sample. The slopes can be used to calculate  $\tau_s$  and PTCE ( $\eta$ ).

| $T_{surr}$ | $T_{max}$ | Absorbance | $\tau_s$ | hs     | PTCE ( $\eta$ ) |
|------------|-----------|------------|----------|--------|-----------------|
| 30 °C      | 61.4 °C   | 1.343      | 303      | 0.0061 | 6.1%            |

Table S1. The PTCE ( $\eta$ ) of Bi<sub>2</sub>Se<sub>3</sub>@ZIF-8 NPs calculated by above-mentioned equations.

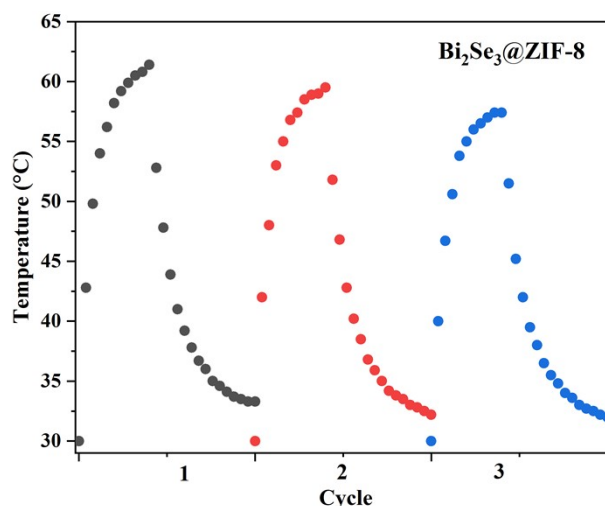

Figure S12. The thermal curve of  $\text{Bi}_2\text{Se}_3@\text{ZIF-8}$  after cyclic irradiation ( $808\text{ nm}$ ,  $3\text{ W}\cdot\text{cm}^{-2}$ ) for three times.

For the purpose of evaluating the photothermal capacity, ZIF-8,  $\text{Bi}_2\text{Se}_3$  NPs, and  $\text{Bi}_2\text{Se}_3@\text{ZIF-8}$  NPs were placed on a quartz glass sheet under irradiation ( $808\text{ nm}$ ,  $0.65\text{ W}\cdot\text{cm}^{-2}$ ) at ambient atmosphere, respectively. The time-dependent temperature changes were recorded by an IR thermal camera. Meanwhile, a quartz glass without any sample on that was tested under the same condition as blank sample.

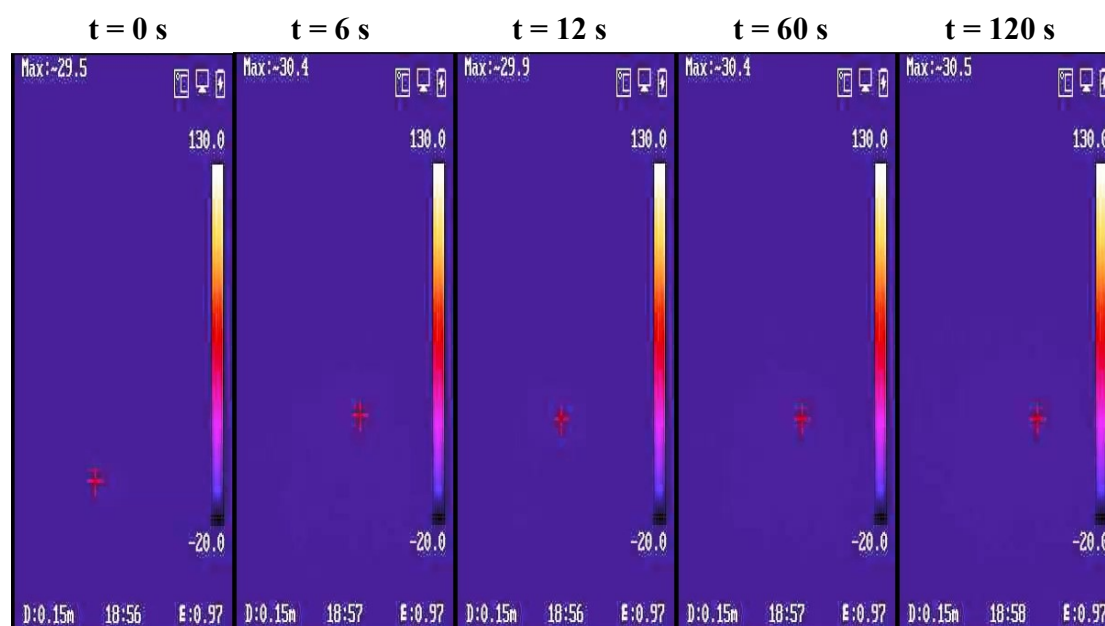

Figure S13. Representative photothermal infrared images of blank at the times of 0, 6, 12, 60, 120 s ( $0.65\text{ W}\cdot\text{cm}^{-2}$ ).

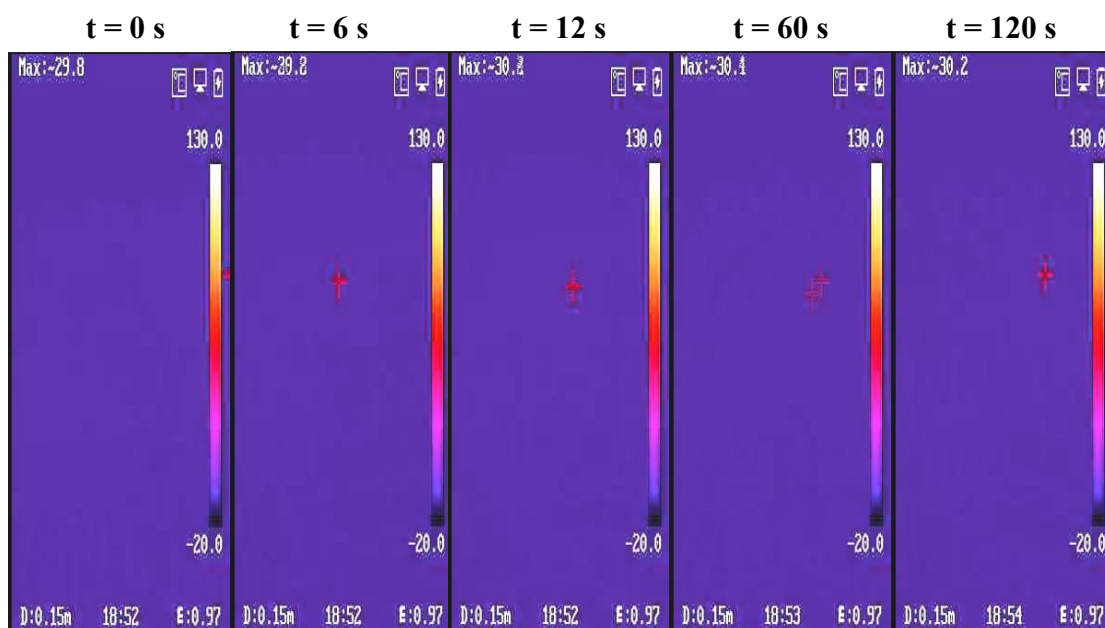

**Figure S14.** Representative photothermal infrared images of ZIF-8 at the times of 0, 6, 12, 60, 120 s ( $0.65 \text{ W} \cdot \text{cm}^{-2}$ ).

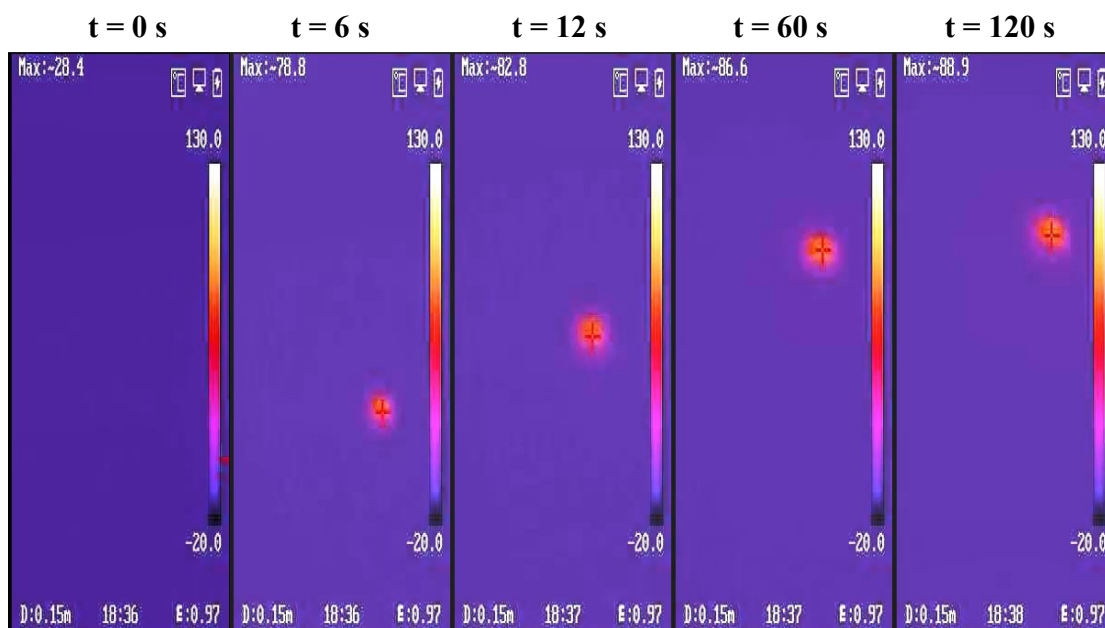

**Figure S15.** Representative photothermal infrared images of  $\text{Bi}_2\text{Se}_3$  NPs at the times of 0, 6, 12, 60, 120 s ( $0.65 \text{ W} \cdot \text{cm}^{-2}$ ).



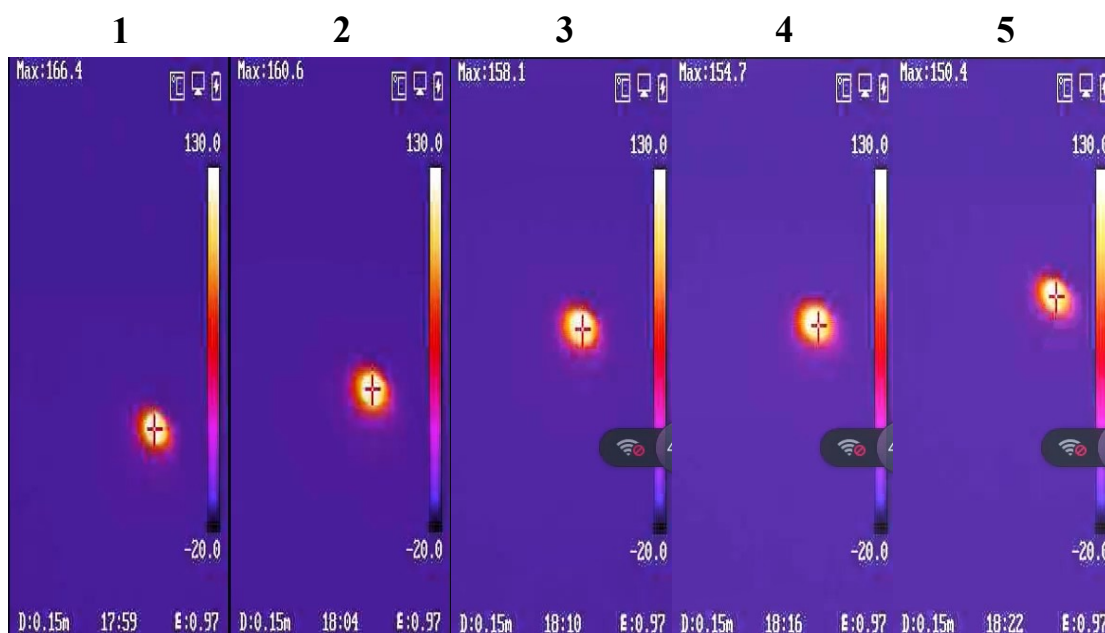

**Figure S16.** Representative photothermal infrared images of  $\text{Bi}_2\text{Se}_3@\text{ZIF-8}$  NPs in five cycles at the time of 120 s ( $0.65 \text{ W} \cdot \text{cm}^{-2}$ ).

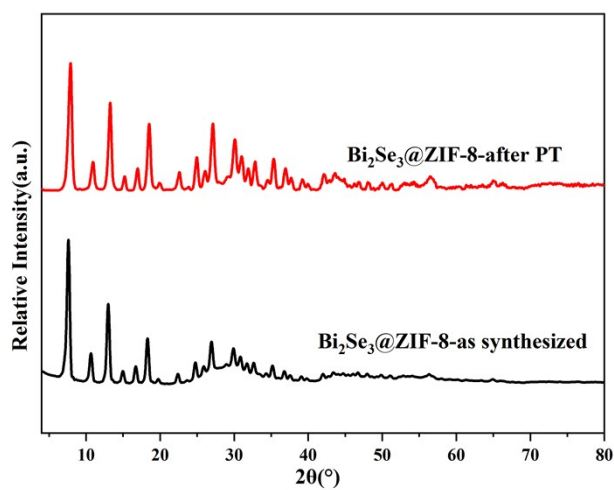

**Figure S17.** PXRD patterns of  $\text{Bi}_2\text{Se}_3@\text{ZIF-8}$  NPs after multiple irradiation cycles.
